# Supplementary material
Source: PubMed Central journal article supplement (PMC8711084)
Supplement: 00411-2021.supplement.pdf [file 00411-2021.supplement.pdf]

# Factors for severe outcomes following SARS-CoV-2 infection in people with cystic fibrosis

## Supplementary Information

**Supplementary Table 1** Number and incidence of SARS-CoV-2 infections in people with cystic fibrosis, by wave and by country.

**Supplementary Table 2** Characteristics of people with cystic fibrosis and SARS-CoV-2 infection who died

**Supplementary Table 3** Univariable analysis of the association of demographics and cystic fibrosis characteristics with symptoms of SARS-CoV-2 infection in people with cystic fibrosis

**Supplementary Table 4** Univariable analysis of the association of demographics and cystic fibrosis characteristics with outcomes of SARS-CoV-2 infection in people with cystic fibrosis

**Supplementary Table 5** Factors associated with symptoms of SARS-CoV-2 infection in people with cystic fibrosis (mixed effects multivariable logistic regression)

**Supplementary Table 6** Factors associated with outcomes of SARS-CoV-2 infection in people with cystic fibrosis (mixed effects multivariable logistic regression)

**Supplementary Table 1**      *Number and incidence of SARS-CoV-2 infections in people with cystic fibrosis, by wave and by country.*

| Country         | Feb-Dec 2020 |               |                             | Wave 1<br>(Feb-June) |               |                             | Wave 2<br>(Jul-Dec) |               |                             |
|-----------------|--------------|---------------|-----------------------------|----------------------|---------------|-----------------------------|---------------------|---------------|-----------------------------|
|                 | Cases        | CF population | Incidence per 1000 (95% CI) | Cases                | CF population | Incidence per 1000 (95% CI) | Cases               | CF population | Incidence per 1000 (95% CI) |
| Armenia         | 2            | 28            | 71.4 (8.8 – 235.0)          | 0                    | 28            | 0.0 (0.0 - 123.4)           | 2                   | 28            | 71.4 (8.8 – 235.0)          |
| Austria         | 13           | 793           | 16.4 (8.8 - 27.9)           | 0                    | 793           | 0.0 (0.0 - 4.6)             | 13                  | 793           | 16.4 (8.8 - 27.9)           |
| Belgium         | 43           | 1298          | 33.1 (24.1 - 44.4)          | 6                    | 1298          | 4.6 (1.7 - 10)              | 37                  | 1298          | 28.5 (20.1 - 39.1)          |
| Croatia         | 4            | 123           | 32.5 (8.9 - 81.2)           | 0                    | 123           | 0.0 (0.0 - 29.5)            | 4                   | 123           | 32.5 (8.9 - 81.2)           |
| Czech Republic  | 24           | 615           | 39.0 (25.2 - 57.5)          | 0                    | 615           | 0.0 (0.0 - 6)               | 24                  | 615           | 39.0 (25.2 - 57.5)          |
| Denmark         | 5            | 512           | 9.8 (3.2 - 22.6)            | 2                    | 512           | 3.9 (0.5 - 14)              | 3                   | 512           | 5.9 (1.2 – 17.0)            |
| France          | 104          | 6940          | 15.0 (12.3 - 18.1)          | 19                   | 6940          | 2.7 (1.6 - 4.3)             | 85                  | 6940          | 12.2 (9.8 - 15.1)           |
| Germany         | 44           | 6361          | 6.9 (5.0 - 9.3)             | 17                   | 6361          | 2.7 (1.6 - 4.3)             | 27                  | 6361          | 4.2 (2.8 - 6.2)             |
| Greece          | 6            | 588           | 10.2 (3.8 - 22.1)           | 2                    | 588           | 3.4 (0.4 - 12.2)            | 4                   | 588           | 6.8 (1.9 - 17.3)            |
| Ireland         | 14           | 1224          | 11.4 (6.3 - 19.1)           | 5                    | 1224          | 4.1 (1.3 - 9.5)             | 9                   | 1224          | 7.4 (3.4 - 13.9)            |
| Israel          | 19           | 537           | 35.4 (21.4 - 54.7)          | 0                    | 537           | 0.0 (0.0 - 6.8)             | 19                  | 537           | 35.4 (21.4 - 54.7)          |
| Italy           | 159          | 5501          | 28.9 (24.6 - 33.7)          | 17                   | 5501          | 3.1 (1.8 - 4.9)             | 142                 | 5501          | 25.8 (21.8 - 30.4)          |
| Latvia          | 1            | 37            | 27.0 (0.7 - 141.6)          | 0                    | 37            | 0.0 (0.0 - 94.9)            | 1                   | 37            | 27.0 (0.7 - 141.6)          |
| Netherlands     | 40           | 1394          | 28.7 (20.6 - 38.9)          | 4                    | 1394          | 2.9 (0.8 - 7.3)             | 36                  | 1394          | 25.8 (18.2 - 35.6)          |
| North Macedonia | 2            | 119           | 16.8 (2.0 - 59.4)           | 0                    | 119           | 0.0 (0.0 - 30.5)            | 2                   | 119           | 16.8 (2.0 - 59.4)           |
| Norway          | 1            | 290           | 3.4 (0.1 - 19.1)            | 1                    | 290           | 3.4 (0.1 - 19.1)            | 0                   | 290           | 0.0 (0.0 - 12.6)            |
| Poland          | 2            | 882           | 2.3 (0.3 - 8.2)             | 2                    | 882           | 2.3 (0.3 - 8.2)             | 0                   | 882           | 0.0 (0.0 - 4.2)             |
| Portugal        | 2            | 296           | 6.8 (0.8 - 24.2)            | 0                    | 296           | 0.0 (0.0 - 12.4)            | 2                   | 296           | 6.8 (0.8 - 24.2)            |
| Russia          | 30           | 3137          | 9.6 (6.5 - 13.6)            | 6                    | 3137          | 1.9 (0.7 - 4.2)             | 24                  | 3137          | 7.7 (4.9 - 11.4)            |
| Slovak Republic | 2            | 278           | 7.2 (0.9 - 25.7)            | 0                    | 278           | 0.0 (0.0 - 13.2)            | 2                   | 278           | 7.2 (0.9 - 25.7)            |
| Slovenia        | 1            | 109           | 9.2 (0.2 - 50.1)            | 0                    | 109           | 0.0 (0.0 - 33.3)            | 1                   | 109           | 9.2 (0.2 - 50.1)            |
| Spain           | 58           | 2192          | 26.5 (20.2 - 34.1)          | 11                   | 2192          | 5.0 (2.5 – 9.0)             | 47                  | 2192          | 21.4 (15.8 - 28.4)          |

|                   | Feb-Dec 2020 |                  |                                   | Wave 1<br>(Feb-June) |                  |                                   | Wave 2<br>(Jul-Dec) |                  |                                   |
|-------------------|--------------|------------------|-----------------------------------|----------------------|------------------|-----------------------------------|---------------------|------------------|-----------------------------------|
| Country           | Cases        | CF<br>population | Incidence<br>per 1000<br>(95% CI) | Cases                | CF<br>population | Incidence<br>per 1000<br>(95% CI) | Cases               | CF<br>population | Incidence<br>per 1000<br>(95% CI) |
| Sweden            | 19           | 689              | 27.6 (16.7 -<br>42.7)             | 6                    | 689              | 8.7 (3.2 -<br>18.9)               | 13                  | 689              | 18.9 (10.1 -<br>32.0)             |
| Switzerland       | 9            | 950              | 9.5 (4.3 -<br>17.9)               | 3                    | 950              | 3.2 (0.7 -<br>9.2)                | 6                   | 950              | 6.3 (2.3 -<br>13.7)               |
| Turkey            | 26           | 1807             | 14.4 (9.4 -<br>21)                | 3                    | 1807             | 1.7 (0.3 -<br>4.8)                | 23                  | 1807             | 12.7 (8.1 -<br>19.0)              |
| United<br>Kingdom | 198          | 9847             | 20.1 (17.4 -<br>23.1)             | 26                   | 9847             | 2.6 (1.7 -<br>3.9)                | 172                 | 9847             | 17.5 (15.0 -<br>20.3)             |
| Sum               | 828          | 48211            | 17.2 (16 -<br>18.4)               | 130                  | 48211            | 2.7 (2.3 -<br>3.2)                | 698                 | 48211            | 14.5 (13.4 -<br>15.6)             |

Abbreviations: CF=cystic fibrosis, CI=confidence interval, SARS-CoV-2=Severe Acute Respiratory Syndrome Coronavirus 2

The following countries reported zero cases of SARS-CoV-2 in people with CF till 31 December 2020: Albania, Belarus, Bulgaria, Cyprus, Georgia, Lithuania, Luxembourg, Republic of Moldova, Romania, Serbia, Ukraine. One country (Hungary) did not report information to ECFSPR.

**Supplementary Table 2**  
**infection who died**

**Characteristics of people with cystic fibrosis and SARS-CoV-2**

|                                                      |                                                 | Number of patients (n=11) |   |
|------------------------------------------------------|-------------------------------------------------|---------------------------|---|
| <b>Demographics</b>                                  | Gender                                          | Female                    | 5 |
|                                                      |                                                 | Male                      | 6 |
|                                                      | Age                                             | 0-11 years                | 3 |
|                                                      |                                                 | 12-17 years               | 1 |
|                                                      |                                                 | 18-29 years               | 2 |
|                                                      |                                                 | 30-39 years               | 2 |
|                                                      |                                                 | 40-49 years               | 3 |
|                                                      | BMI, z score <sup>1</sup>                       | Missing                   | 1 |
|                                                      |                                                 | <-2                       | 3 |
| -2 - 2                                               |                                                 | 7                         |   |
| <b>Cystic fibrosis pre-infection characteristics</b> | Lung transplant <sup>2</sup>                    | 4                         |   |
|                                                      | CFTR genotype                                   | Other/other               | 3 |
|                                                      |                                                 | F508del/other             | 2 |
|                                                      |                                                 | F508del/F508del           | 6 |
|                                                      | Lung disease (ppFEV <sub>1</sub> ) <sup>3</sup> | Missing                   | 2 |
|                                                      |                                                 | Severe (≤40%)             | 4 |
|                                                      |                                                 | Moderate (>40-70%)        | 4 |
|                                                      |                                                 | Mild (>70%)               | 1 |
|                                                      | <i>Pseudomonas aeruginosa</i>                   | 6                         |   |
|                                                      | CF related diabetes                             | 7                         |   |
| Pancreatic insufficiency                             | 11                                              |                           |   |
| <b>Outcomes</b>                                      | Oxygen therapy                                  | 9                         |   |
|                                                      | Respiratory support                             | 7                         |   |
|                                                      | Hospital                                        | 10                        |   |
|                                                      | Intensive care                                  | 6                         |   |
| <b>Cause of death</b>                                | SARS-CoV-2 infection                            | 8                         |   |
|                                                      | Other <sup>4</sup>                              | 1                         |   |
|                                                      | Unknown <sup>5</sup>                            | 2                         |   |

Abbreviations: BMI=body mass index, CFTR=cystic fibrosis transmembrane conductance regulator, ppFEV<sub>1</sub>=percent predicted forced expiratory volume

1 BMI z-score was only calculated for patients aged 2 years and over

2 No patient who died had received transplant of a solid organ other than lung

3 ppFEV<sub>1</sub> was only calculated for patients aged 6 years and over

4 This was a paediatric lung-transplanted patient.

5 Both were adults who died within 3 months of SARS-CoV-2 infection

**Supplementary Table 3**      *Univariable analysis of the association of demographics and cystic fibrosis characteristics with symptoms of SARS-CoV-2 infection in people with cystic fibrosis*

| Characteristics of pwCF          |                           | Presence of symptoms   |         | General symptoms       |         | Gastrointestinal symptoms |         | Pulmonary symptoms     |         |
|----------------------------------|---------------------------|------------------------|---------|------------------------|---------|---------------------------|---------|------------------------|---------|
|                                  |                           | Odds Ratio<br>(95% CI) | p-value | Odds Ratio<br>(95% CI) | p-value | Odds Ratio<br>(95% CI)    | p-value | Odds Ratio<br>(95% CI) | p-value |
| Gender                           | male vs female            | 0.9 (0.6 - 1.2)        | 0.712   | 1.1 (0.7 - 1.5)        | 0.914   | 1.1 (0.7 - 1.6)           | 0.898   | 0.8 (0.6 - 1.0)        | 0.208   |
| Age                              | 18-29 vs 0-17 years       | 1.3 (0.9 - 1.8)        | 0.430   | 1.7 (1.1 - 2.5)        | 0.098   | 0.7 (0.4 - 1.2)           | 0.674   | 1.8 (1.3 - 2.6)        | 0.014   |
|                                  | 30-39 vs 0-17 years       | 1.9 (1.2 - 3.1)        | 0.112   | 2.4 (1.5 - 3.8)        | <0.001  | 0.8 (0.4 - 1.5)           | 0.683   | 2.1 (1.1 - 4.3)        | 0.140   |
|                                  | 40+ vs 0-17 years         | 3.8 (1.7 - 8.9)        | 0.056   | 4.7 (2.5 - 9.0)        | <0.001  | 0.5 (0.1 - 1.7)           | 0.674   | 4.9 (2.8 - 8.8)        | <0.001  |
| Genotype                         | Any F508del vs no F508del | 1.9 (1.1 - 3.1)        | 0.117   | 1.7 (0.9 - 3.1)        | 0.378   | 1.3 (0.3 - 5.3)           | 0.897   | 1.2 (0.9 - 1.6)        | 0.405   |
| BMI underweight <sup>1</sup>     | Yes vs No                 | 0.8 (0.4 - 1.7)        | 0.823   | 0.9 (0.5 - 1.7)        | 0.914   | 1.9 (0.9 - 3.9)           | 0.674   | 0.9 (0.5 - 1.6)        | 0.857   |
| Lung function (FEV1 % predicted) | >40-70% vs >70%           | 1.2 (0.7 - 2.1)        | 0.712   | 1.3 (0.8 - 2.1)        | 0.600   | 1.2 (0.7 - 1.9)           | 0.775   | 1.5 (1.1 - 2.2)        | 0.121   |
|                                  | ≤40% vs >70%              | 1.2 (0.7 - 2.0)        | 0.823   | 1.3 (0.8 - 2.2)        | 0.635   | 1.2 (0.7 - 2.2)           | 0.778   | 1.8 (1.1 - 3.1)        | 0.118   |
| Pancreatic insufficiency         | Yes vs No                 | 0.7 (0.5 - 0.9)        | 0.117   | 0.6 (0.4 - 0.8)        | 0.028   | 0.7 (0.4 - 1.4)           | 0.674   | 0.7 (0.5 - 0.9)        | 0.070   |
| CF related diabetes              | Yes vs No                 | 0.8 (0.5 - 1.4)        | 0.809   | 1.0 (0.6 - 1.5)        | 0.914   | 0.7 (0.3 - 1.4)           | 0.674   | 1.1 (0.8 - 1.7)        | 0.779   |
| Lung transplant                  | Yes vs No                 | 1.5 (0.9 - 2.4)        | 0.389   | 1.3 (0.9 - 1.9)        | 0.600   | 1.1 (0.4 - 3.3)           | 0.936   | 1.0 (0.7 - 1.5)        | 0.890   |
| ABPA                             | Yes vs No                 | 1.2 (0.4 - 3.1)        | 0.933   | 1.0 (0.5 - 2.1)        | 0.994   | 0.6 (0.1 - 2.4)           | 0.683   | 1.8 (1.0 - 3.4)        | 0.148   |
| Chronic liver GI disease         | Yes vs No                 | 1.1 (0.6 - 2.0)        | 0.897   | 1.2 (0.8 - 1.8)        | 0.754   | 0.7 (0.3 - 1.5)           | 0.674   | 1.0 (0.7 - 1.3)        | 0.857   |
| Systemic arterial hypertension   | Yes vs No                 | 1.9 (1.0 - 3.8)        | 0.216   | 1.7 (0.9 - 3.2)        | 0.356   | 3.0 (1.4 - 6.4)           | 0.168   | 2.1 (1.0 - 4.2)        | 0.147   |
| CFTR modulator therapy           | Yes vs No                 | 0.8 (0.6 - 1.1)        | 0.406   | 0.8 (0.6 - 1.1)        | 0.600   | 0.6 (0.2 - 1.7)           | 0.676   | 1.0 (0.7 - 1.4)        | 0.898   |

| Characteristics of pwCF             |           | Presence of symptoms |       | General symptoms |       | Gastrointestinal symptoms |       | Pulmonary symptoms |       |
|-------------------------------------|-----------|----------------------|-------|------------------|-------|---------------------------|-------|--------------------|-------|
| Inhaled antibiotics                 | Yes vs No | 0.7 (0.5 - 1.2)      | 0.430 | 1.0 (0.6 - 1.6)  | 0.948 | 0.7 (0.4 - 1.2)           | 0.674 | 1.1 (0.7 - 1.8)    | 0.779 |
| Oral antibiotics                    | Yes vs No | 0.6 (0.4 - 0.9)      | 0.117 | 0.7 (0.4 - 1.2)  | 0.600 | 0.4 (0.1 - 1.4)           | 0.674 | 1.3 (0.9 - 1.7)    | 0.325 |
| Inhaled steroid                     | Yes vs No | 1.1 (0.8 - 1.7)      | 0.823 | 1.2 (0.8 - 1.6)  | 0.675 | 1.0 (0.5 - 2.2)           | 0.936 | 1.3 (1.0 - 1.8)    | 0.208 |
| Azithromycin                        | Yes vs No | 1.0 (0.6 - 1.5)      | 0.933 | 1.1 (0.7 - 1.7)  | 0.914 | 0.9 (0.5 - 1.6)           | 0.897 | 1.5 (1.0 - 2.3)    | 0.148 |
| DNase                               | Yes vs No | 0.8 (0.5 - 1.1)      | 0.347 | 0.8 (0.6 - 1.0)  | 0.134 | 0.6 (0.3 - 1.2)           | 0.674 | 0.8 (0.6 - 1.2)    | 0.369 |
| Hypertonic Saline                   | Yes vs No | 0.8 (0.6 - 1.1)      | 0.417 | 0.8 (0.6 - 1.1)  | 0.600 | 1.1 (0.6 - 2.0)           | 0.898 | 1 (0.7 - 1.4)      | 1.000 |
| <i>Pseudomonas aeruginosa</i>       | Yes vs No | 1.4 (1.1 - 1.8)      | 0.117 | 1.4 (1.0 - 1.9)  | 0.238 | 0.5 (0.3 - 1.0)           | 0.462 | 1.6 (1.1 - 2.3)    | 0.056 |
| <i>Staphylococcus aureus</i>        | Yes vs No | 1.0 (0.6 - 1.6)      | 0.997 | 0.9 (0.6 - 1.5)  | 0.914 | 1.1 (0.5 - 2.4)           | 0.898 | 0.9 (0.7 - 1.1)    | 0.369 |
| <i>Burkholderia cepacia</i> complex | Yes vs No | 1.0 (0.6 - 1.7)      | 0.980 | 1.1 (0.5 - 2.3)  | 0.914 | 1 (0.3 - 3.9)             | 0.943 | 1.2 (0.6 - 2.3)    | 0.779 |
| MRSA                                | Yes vs No | 0.9 (0.5 - 1.7)      | 0.933 | 1.1 (0.6 - 2.2)  | 0.914 | 1.7 (0.6 - 4.7)           | 0.674 | 0.7 (0.4 - 1.1)    | 0.321 |
| <i>Stenotrophomonas maltophilia</i> | Yes vs No | 0.9 (0.5 - 1.6)      | 0.933 | 0.8 (0.5 - 1.3)  | 0.675 | 0.7 (0.3 - 1.8)           | 0.683 | 1.4 (0.8 - 2.2)    | 0.369 |
| <i>Achromobacter</i> species        | Yes vs No | 0.9 (0.5 - 1.9)      | 0.933 | 1.0 (0.6 - 1.7)  | 0.948 | 1.7 (0.7 - 3.8)           | 0.674 | 1.3 (0.6 - 2.6)    | 0.704 |
| <i>Aspergillus</i> colonisation     | Yes vs No | 1.3 (0.9 - 1.9)      | 0.430 | 1.2 (0.8 - 1.9)  | 0.600 | 1.5 (0.6 - 3.6)           | 0.674 | 1.2 (0.9 - 1.7)    | 0.325 |

Abbreviations: ABPA= allergic bronchopulmonary aspergillosis, BMI=body mass index, CFTR=cystic fibrosis transmembrane conductance regulator, GI=gastrointestinal, MRSA= methicillin-resistant *Staphylococcus aureus*, FEV1=percent predicted forced expiratory volume, Iva=ivacaftor, Tez=tezacaftor, Lum=lumacaftor, Elexa=elexacaftor

p-values are adjusted for multiple comparison using False Discovery Rate method.

1 A person was considered underweight if their BMI z score was <-2

**Supplementary Table 4**      *Univariable analysis of the association of demographics and cystic fibrosis characteristics with outcomes of SARS-CoV-2 infection in people with cystic fibrosis*

| Characteristics of pwCF          |                           | Hospitalization        |         | ICU                    |         | Oxygen therapy         |         | Respiratory support    |         |
|----------------------------------|---------------------------|------------------------|---------|------------------------|---------|------------------------|---------|------------------------|---------|
|                                  |                           | Odds Ratio<br>(95% CI) | p-value |
| Gender                           | male vs female            | 0.7 (0.5 - 0.9)        | 0.037   | 1.2 (0.6 - 2.3)        | 0.716   | 0.9 (0.5 - 1.3)        | 0.610   | 1.1 (0.5 - 2.2)        | 0.982   |
| Age                              | 18-29 vs 0-17 years       | 1.0 (0.8 - 1.4)        | 0.883   | 0.7 (0.2 - 2.0)        | 0.676   | 1.0 (0.6 - 1.7)        | 0.892   | 0.5 (0.2 - 1.6)        | 0.518   |
|                                  | 30-39 vs 0-17 years       | 1.5 (0.9 - 2.5)        | 0.191   | 1.5 (0.4 - 5.8)        | 0.685   | 1.6 (0.6 - 4.3)        | 0.427   | 1.5 (0.6 - 3.8)        | 0.616   |
|                                  | 40+ vs 0-17 years         | 2.4 (1.6 - 3.6)        | <0.001  | 2.9 (0.9 - 9.1)        | 0.202   | 2.4 (1.4 - 4.2)        | 0.008   | 2.9 (1.3 - 6.2)        | 0.032   |
| Genotype                         | Any F508del vs no F508del | 1.0 (0.7 - 1.3)        | 0.905   | 1.8 (1.1 - 3.2)        | 0.144   | 0.8 (0.5 - 1.4)        | 0.541   | 1.2 (0.6 - 2.3)        | 0.708   |
| BMI underweight <sup>1</sup>     | Yes vs No                 | 3.8 (2.1 - 7.0)        | <0.001  | 1.5 (0.5 - 4.8)        | 0.685   | 3.1 (1.7 - 5.7)        | <0.001  | 2.0 (0.7 - 5.6)        | 0.405   |
| Lung function (FEV1 % predicted) | >40-70% vs >70%           | 2.7 (2.0 - 3.6)        | <0.001  | 2.3 (1.1 - 5.1)        | 0.144   | 5.4 (3.0 - 9.5)        | <0.001  | 5.7 (2.3 - 14.0)       | <0.001  |
|                                  | ≤40% vs >70%              | 8.1 (4.0 - 16.5)       | <0.001  | 2.6 (0.7 - 9.7)        | 0.387   | 18.2 (9.4 - 35.2)      | <0.001  | 8.5 (2.9 - 25.2)       | <0.001  |
| Pancreatic insufficiency         | Yes vs No                 | 1.8 (1.2 - 2.5)        | 0.005   | 2.3 (0.5 - 10.8)       | 0.487   | 1.8 (0.9 - 3.7)        | 0.224   | 1.7 (0.6 - 4.6)        | 0.525   |
| CF related diabetes              | Yes vs No                 | 2.6 (1.9 - 3.7)        | <0.001  | 4.6 (2.3 - 9.5)        | <0.001  | 2.1 (1.6 - 2.9)        | <0.001  | 3.2 (1.7 - 5.8)        | <0.001  |
| Lung transplant                  | Yes vs No                 | 3.9 (2.8 - 5.4)        | <0.001  | 6.5 (3.2 - 13.2)       | <0.001  | 3.0 (2.1 - 4.5)        | <0.001  | 4.1 (2.2 - 7.5)        | <0.001  |
| ABPA                             | Yes vs No                 | 2.5 (1.5 - 4.2)        | <0.001  | 1.8 (0.6 - 6.1)        | 0.499   | 1.9 (1.1 - 3.3)        | 0.066   | 1.1 (0.2 - 5.2)        | 0.988   |
| Chronic liver GI disease         | Yes vs No                 | 1.1 (0.9 - 1.5)        | 0.459   | 1.3 (0.5 - 3.5)        | 0.716   | 1.5 (1.0 - 2.2)        | 0.164   | 1.0 (0.5 - 2.1)        | 0.988   |
| Systemic arterial hypertension   | Yes vs No                 | 3.1 (1.8 - 5.4)        | <0.001  | 5.5 (1.1 - 27.0)       | 0.144   | 3.2 (1.7 - 5.9)        | <0.001  | 3.1 (1.1 - 9.2)        | 0.109   |

| Characteristics of pwCF             |           | Hospitalization |        | ICU              |       | Oxygen therapy  |        | Respiratory support |        |
|-------------------------------------|-----------|-----------------|--------|------------------|-------|-----------------|--------|---------------------|--------|
|                                     |           |                 |        |                  |       |                 |        |                     |        |
| CFTR modulator therapy              | Yes vs No | 0.7 (0.5 – 1.0) | 0.058  | 0.5 (0.2 - 1.2)  | 0.313 | 0.9 (0.6 - 1.3) | 0.620  | 0.6 (0.3 - 1.1)     | 0.287  |
| Inhaled antibiotics                 | Yes vs No | 1.9 (1.1 - 3.5) | 0.049  | 5.5 (1.2 – 25.0) | 0.144 | 3.1 (1.9 – 5.0) | <0.001 | 6.8 (1.9 – 25.0)    | 0.019  |
| Oral antibiotics                    | Yes vs No | 1.5 (1.1 - 2.1) | 0.038  | 3.7 (1.3 - 10.5) | 0.140 | 1.6 (1.0 - 2.7) | 0.154  | 2.0 (0.8 - 4.7)     | 0.287  |
| Inhaled steroid                     | Yes vs No | 1.4 (0.9 - 2.2) | 0.191  | 0.5 (0.2 – 1.0)  | 0.165 | 1.1 (0.7 - 1.8) | 0.704  | 0.8 (0.4 - 1.7)     | 0.708  |
| Azithromycin                        | Yes vs No | 2.7 (1.9 - 3.8) | <0.001 | 2.0 (1.0 - 4.1)  | 0.165 | 3.3 (2.1 - 5.4) | <0.001 | 2.5 (1.2 - 5.5)     | 0.059  |
| DNase                               | Yes vs No | 1.1 (0.7 – 2.0) | 0.747  | 0.6 (0.2 - 1.6)  | 0.499 | 1.4 (0.8 - 2.5) | 0.395  | 1.5 (0.6 - 3.7)     | 0.647  |
| Hypertonic Saline                   | Yes vs No | 0.9 (0.5 - 1.6) | 0.883  | 0.8 (0.3 - 2.4)  | 0.726 | 1.1 (0.5 - 2.1) | 0.880  | 0.8 (0.4 - 1.8)     | 0.742  |
| <i>Pseudomonas aeruginosa</i>       | Yes vs No | 2.1 (1.5 – 3.0) | <0.001 | 1.0 (0.5 - 2.3)  | 0.901 | 2.6 (1.7 - 3.9) | <0.001 | 2.3 (1.2 - 4.8)     | 0.059  |
| <i>Staphylococcus aureus</i>        | Yes vs No | 0.8 (0.6 - 1.1) | 0.180  | 0.6 (0.2 - 1.4)  | 0.401 | 0.7 (0.5 - 1.1) | 0.269  | 0.6 (0.2 - 1.6)     | 0.592  |
| <i>Burkholderia cepacia</i> complex | Yes vs No | 1.0 (0.4 - 2.4) | 0.939  | 1.8 (0.2 - 17.1) | 0.716 | 1.7 (0.7 - 3.8) | 0.376  | 1.0 (0.1 - 8.2)     | 0.988  |
| MRSA                                | Yes vs No | 1.5 (0.9 - 2.6) | 0.191  | 2.5 (0.6 - 10.2) | 0.396 | 1.3 (0.8 - 2.3) | 0.427  | Not available       | <0.001 |
| <i>Stenotrophomonas maltophilia</i> | Yes vs No | 1.6 (1.0 - 2.5) | 0.073  | 1.3 (0.3 – 5.0)  | 0.726 | 1.5 (0.8 - 2.8) | 0.395  | 1.3 (0.4 - 4.6)     | 0.828  |
| <i>Achromobacter</i> species        | Yes vs No | 2.3 (1.5 - 3.6) | <0.001 | 2.3 (0.7 - 8.3)  | 0.396 | 1.4 (0.7 - 2.9) | 0.496  | 0.4 (0.1 - 3.3)     | 0.639  |
| <i>Aspergillus</i> colonisation     | Yes vs No | 1.9 (1.0 - 3.5) | 0.068  | 0.4 (0.0 - 3.5)  | 0.607 | 0.8 (0.3 - 1.9) | 0.697  | 1.0 (0.4 - 2.7)     | 0.988  |

Abbreviations: ABPA= allergic bronchopulmonary aspergillosis, BMI=body mass index, CFTR=cystic fibrosis transmembrane conductance regulator, GI=gastrointestinal, MRSA= methicillin-resistant *Staphylococcus aureus*, FEV1=percent predicted forced expiratory volume, Iva=ivacaftor, Tez=tezacaftor, Lum=lumacaftor, Elexa=elexacaftor

p-values are adjusted for multiple comparison using False Discovery Rate method.

1 A person was considered underweight if their BMI z score was <-2





**Supplementary Table 5** Factors associated with symptoms of SARS-CoV-2 infection in people with cystic fibrosis (mixed effects multivariable logistic regression)

| Characteristics of pwCF          |                           | Any symptoms           |         | General symptoms       |         | Pulmonary symptoms     |         |
|----------------------------------|---------------------------|------------------------|---------|------------------------|---------|------------------------|---------|
|                                  |                           | Odds Ratio<br>(95% CI) | p-value | Odds Ratio<br>(95% CI) | p-value | Odds Ratio<br>(95% CI) | p-value |
| Gender                           | male vs female            | 0.8 (0.6 - 1.2)        | 0.344   | 1.1 (0.8 - 1.7)        | 0.521   | 0.8 (0.7 - 1)          | 0.086   |
| Age                              | 18-29 vs 0-17 years       | 1.1 (0.7 - 1.7)        | 0.677   | 1.4 (0.9 - 2.3)        | 0.157   | 1.7 (1.1 - 2.6)        | 0.023   |
|                                  | 30-39 vs 0-17 years       | 1.6 (0.9 - 3.0)        | 0.113   | 2.0 (1.1 - 3.7)        | 0.028   | 2.1 (1.1 - 4.3)        | 0.035   |
|                                  | 40+ vs 0-17 years         | 2.6 (1.2 - 5.3)        | 0.010   | 2.9 (1.6 - 5.2)        | <0.001  | 4.0 (2.0 - 8.1)        | <0.001  |
| Genotype                         | Any F508del vs no F508del | 2.1 (1.3 - 3.5)        | 0.004   | 1.9 (1.1 - 3.2)        | 0.018   | 1.3 (0.9 - 1.9)        | 0.111   |
| BMI underweight                  | Yes vs No                 | 0.8 (0.3 - 2.3)        | 0.743   | 0.9 (0.4 - 2.5)        | 0.885   | 0.8 (0.5 - 1.5)        | 0.555   |
| Lung function (FEV1 % predicted) | >40-70% vs >70%           | 1.3 (0.8 - 2.2)        | 0.233   | 1.4 (0.8 - 2.3)        | 0.205   | 1.3 (0.9 - 1.8)        | 0.140   |
|                                  | ≤40% vs >70%              | 1.3 (0.7 - 2.4)        | 0.338   | 1.3 (0.7 - 2.4)        | 0.433   | 1.6 (0.9 - 2.9)        | 0.091   |
| Pancreatic enzymes               | Yes vs No                 | 0.6 (0.4 - 1.0)        | 0.061   | 0.5 (0.2 - 0.9)        | 0.019   | 0.7 (0.5 - 1.1)        | 0.162   |
| CF related diabetes              | Yes vs No                 | 0.7 (0.5 - 1.2)        | 0.192   | 0.9 (0.6 - 1.4)        | 0.619   | 0.9 (0.6 - 1.3)        | 0.550   |
| Lung transplant                  | Yes vs No                 | 1.1 (0.6 - 2.1)        | 0.736   | 1.0 (0.5 - 1.8)        | 0.916   | 0.8 (0.5 - 1.1)        | 0.190   |
| CFTR modulator therapy           | Yes vs No                 | 0.8 (0.6 - 1.0)        | 0.084   | 0.8 (0.6 - 1.1)        | 0.199   | 0.8 (0.6 - 1.2)        | 0.379   |
| Azithromycin                     | Yes vs No                 | 0.8 (0.5 - 1.4)        | 0.493   | 1.0 (0.6 - 1.6)        | 0.900   | 1.4 (0.9 - 2.2)        | 0.123   |
| <i>Pseudomonas aeruginosa</i>    | Yes vs No                 | 1.0 (0.7 - 1.4)        | 0.790   | 0.9 (0.6 - 1.3)        | 0.626   | 1.1 (0.7 - 1.7)        | 0.687   |

**Supplementary Table 6** Factors associated with outcomes of SARS-CoV-2 infection in people with cystic fibrosis (mixed effects multivariable logistic regression)

| Characteristics of pwCF          |                           | Hospitalization        |         | Oxygen therapy         |         |
|----------------------------------|---------------------------|------------------------|---------|------------------------|---------|
|                                  |                           | Odds Ratio<br>(95% CI) | p-value | Odds Ratio<br>(95% CI) | p-value |
| Gender                           | male vs female            | 0.8 (0.5 - 1.2)        | 0.241   | 1.1 (0.7 - 1.8)        | 0.705   |
| Age                              | 18-29 vs 0-17 years       | 0.6 (0.4 - 1.0)        | 0.060   | 0.4 (0.2 - 0.8)        | 0.009   |
|                                  | 30-39 vs 0-17 years       | 0.8 (0.4 - 1.7)        | 0.607   | 0.7 (0.3 - 1.7)        | 0.443   |
|                                  | 40+ vs 0-17 years         | 1.3 (0.7 - 2.2)        | 0.427   | 0.9 (0.5 - 1.8)        | 0.795   |
| Genotype                         | Any F508del vs no F508del | 0.9 (0.6 - 1.3)        | 0.472   | 0.8 (0.4 - 1.3)        | 0.298   |
| BMI underweight                  | Yes vs No                 | 1.9 (0.8 - 4.5)        | 0.119   | 0.6 (0.2 - 1.9)        | 0.398   |
| Lung function (FEV1 % predicted) | >40-70% vs >70%           | 2.4 (1.6 - 3.6)        | <0.001  | 5.2 (3.2 - 8.4)        | <0.001  |
|                                  | ≤40% vs >70%              | 5.4 (2.2 - 13.0)       | <0.001  | 20 (10.7 - 37.5)       | <0.001  |
| Pancreatic enzymes               | Yes vs No                 | 1.2 (0.8 - 1.8)        | 0.404   | 1.2 (0.4 - 3.4)        | 0.712   |
| CF related diabetes              | Yes vs No                 | 1.7 (1.1 - 2.6)        | 0.027   | 1.4 (0.9 - 2.3)        | 0.172   |
| Lung transplant                  | Yes vs No                 | 3.2 (1.7 - 6.1)        | <0.001  | 3.3 (1.4 - 7.4)        | 0.005   |
| CFTR modulator therapy           | Yes vs No                 | 0.6 (0.4 - 1.0)        | 0.051   | 0.8 (0.5 - 1.4)        | 0.487   |
| Azithromycin                     | Yes vs No                 | 1.8 (1.1 - 2.9)        | 0.017   | 2.4 (1.4 - 4.0)        | 0.002   |
| <i>Pseudomonas aeruginosa</i>    | Yes vs No                 | 1.2 (0.7 - 1.9)        | 0.485   | 1.1 (0.7 - 1.8)        | 0.552   |

ICU and Respiratory support had too few patients to fit multivariable model (note-univariable models were fitted, Supplementary Tables 2 and 3))
